# Supplementary material for: The potential for long-term operation of a lithium–oxygen battery using a non-carbonate-based electrolyte
Source: Royal Society of Chemistry journal article supplement (doi:10.1039/c2cc32788k), 2012-01-01
Supplement: c2cc32788k.pdf [file c2cc32788k.pdf]

## **Electronic Supplementary Information**

### **The potential for long-term operation of a lithium–oxygen battery using a non-carbonate-based electrolyte**

*Hee-Dae Lim, Kyu-Young Park, Hyeokjo Gwon, Jihyun Hong, Haegyeom Kim and Kisuk Kang\**

Department of Materials Science and Engineering, Research Institute of Advanced Materials,  
Seoul National University, 1 Gwanak-ro, Gwanak-gu, Seoul 151-742 (Republic of Korea)

[\*] Prof. K. Kang

E-mail: matlgen1@snu.ac.kr

Fax: +82-2-880-8197, Tel: +82-2-880-7088

## Experimental details

The air (O<sub>2</sub>) electrode was prepared by pasting a mixture of Ketjen black (KB, EC 600JD, Ilshin Chemtech) and Kynar 2801 binder at a weight ratio of 8:2 onto Ni mesh. The Li–O<sub>2</sub> cell was constructed by stacking lithium metal (3/8-in diameter), a glass fiber separator (Whatman GF/D microfiber filter paper, 2.7-μm pore size), and the air electrode in sequence. TEGDME with 1 M LiPF<sub>6</sub> was used as an electrolyte in a Swagelok cell. All of the electrochemical tests were carried out using a potentiogalvanostat (WonA Tech, WBCS 3000, Korea) in an oxygen atmosphere (770 Torr), which was constantly maintained by a throttle valve at room temperature. In a controlled experiment, the charge cutoff was limited to 4.2 V, and the discharge cutoff was constrained to 500 mAh g<sup>-1</sup> with 3 hours limitation. All of the capacities were calculated based on the initial weight of KB in the electrodes. The air electrode at each step was measured by X-ray photoelectron spectroscopy (XPS, Thermo VG Scientific, Sigma Probe, England).

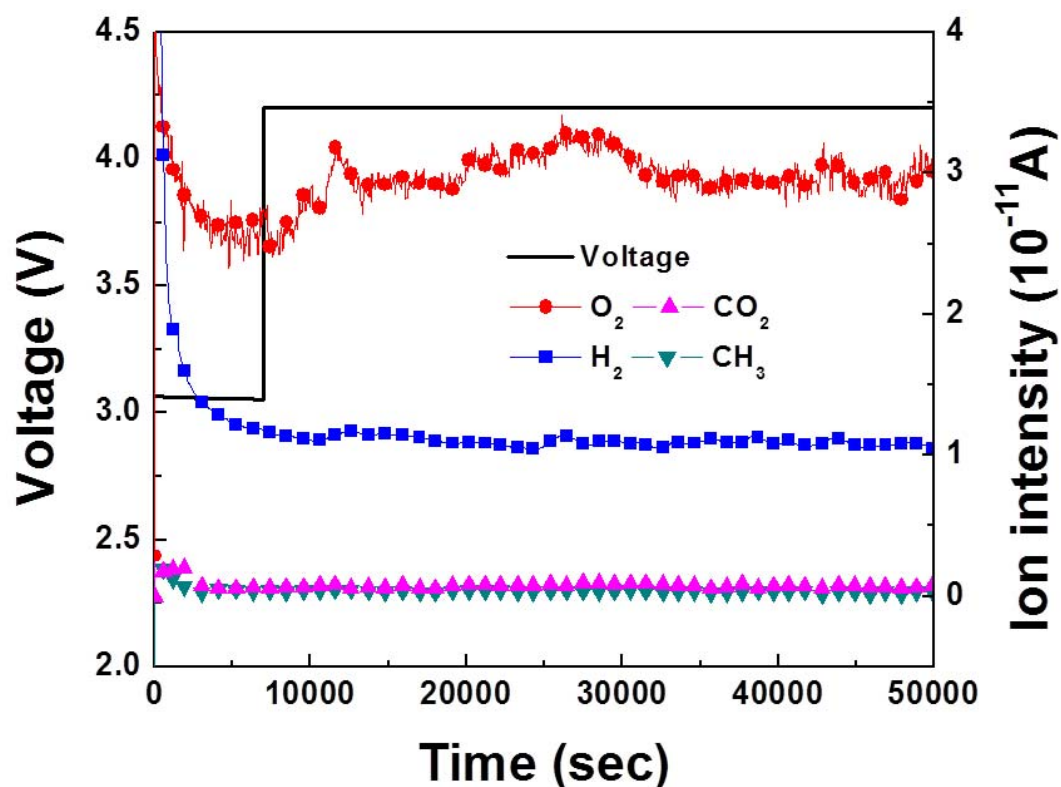

**Figure S1.** Gas evolution result of Li-O<sub>2</sub> cell during charge.

Gas analysis was carried out to investigate the gas evolution by Differential electrochemical mass spectrometry (DEMS). DEMS was composed of a mass spectrometer (MS) (HPR-20, Hiden Analytical) and a potentiogalvanostat. The cell was discharged in advance, and then, charged at a constant voltage of 4.2 V. Before the gas analysis, the DEMS cell was fully relaxed with Ar for 2h. The gases from the cell during charge were swept into a MS. The result proves that the oxygen gas starts to evolve with the initiation of a charge process. The major evolving gas type is oxygen, and the signals of other gases such as H<sub>2</sub>, CH<sub>3</sub>, CO<sub>2</sub> were significantly lower. In particular, the evolution of CO<sub>2</sub> gas is negligible, which indicates that the decomposition is mainly from Li<sub>2</sub>O<sub>2</sub> not from Li<sub>2</sub>CO<sub>3</sub>.
